# Supplementary material for: Basal and IL-1β enhanced chondrocyte chemotactic activity on monocytes are co-dependent on both IKKα and IKKβ NF-κB activating kinases
Source: Springer Nature journal article supplement (doi:10.1038/s41598-021-01063-2), 2021-11-04
Supplement: MOESM1 [file 41598_2021_1063_MOESM1_ESM.pdf]

# SUPPLEMENTARY MATERIAL

## **Basal and IL-1 $\beta$ enhanced chondrocyte chemotactic activity on monocytes are co-dependent on both IKK $\alpha$ and IKK $\beta$ NF- $\kappa$ B activating kinases**

Eleonora Olivotto<sup>1</sup>, Manuela Minguzzi<sup>2</sup>, Stefania D'Adamo<sup>2</sup>, Annalisa Astolfi<sup>3</sup>, Spartaco Santi<sup>4,5</sup>,  
Mariagrazia Uguccioni<sup>6,7</sup>, Kenneth B. Marcu<sup>8#</sup> and Rosa Maria Borzi<sup>9#</sup>

<sup>1</sup>Laboratorio RAMSES, IRCCS Istituto Ortopedico Rizzoli, Bologna, Italy

<sup>2</sup>Dipartimento di Scienze Mediche e Chirurgiche (DIMEC), Università di Bologna, Bologna, Italy

<sup>3</sup>Department of Translational Medicine, University of Ferrara, Ferrara, Italy

<sup>4</sup>CNR Institute of Molecular Genetics “Luigi Luca Cavalli-Sforza”, Unit of Bologna, Bologna, Italy.

<sup>5</sup>IRCCS, Istituto Ortopedico Rizzoli, Bologna, Italy

<sup>6</sup>Institute for Research in Biomedicine, Università della Svizzera italiana, Bellinzona, Switzerland

<sup>7</sup>Dept. of Biomedical Sciences, Humanitas University, Pieve Emanuele – Milan, Italy

<sup>8</sup>Departments of Biochemistry and Cell Biology and Pathology, SUNY, Stony Brook, NY, United States

<sup>9</sup>Laboratorio di Immunoreumatologia e Rigenerazione Tissutale, IRCCS Istituto Ortopedico Rizzoli, Bologna, Italy

Correspondence should be addressed to Rosa Maria Borzi; [rosamaria.borzi@ior.it](mailto:rosamaria.borzi@ior.it)

**# = equal contributors**

# S1

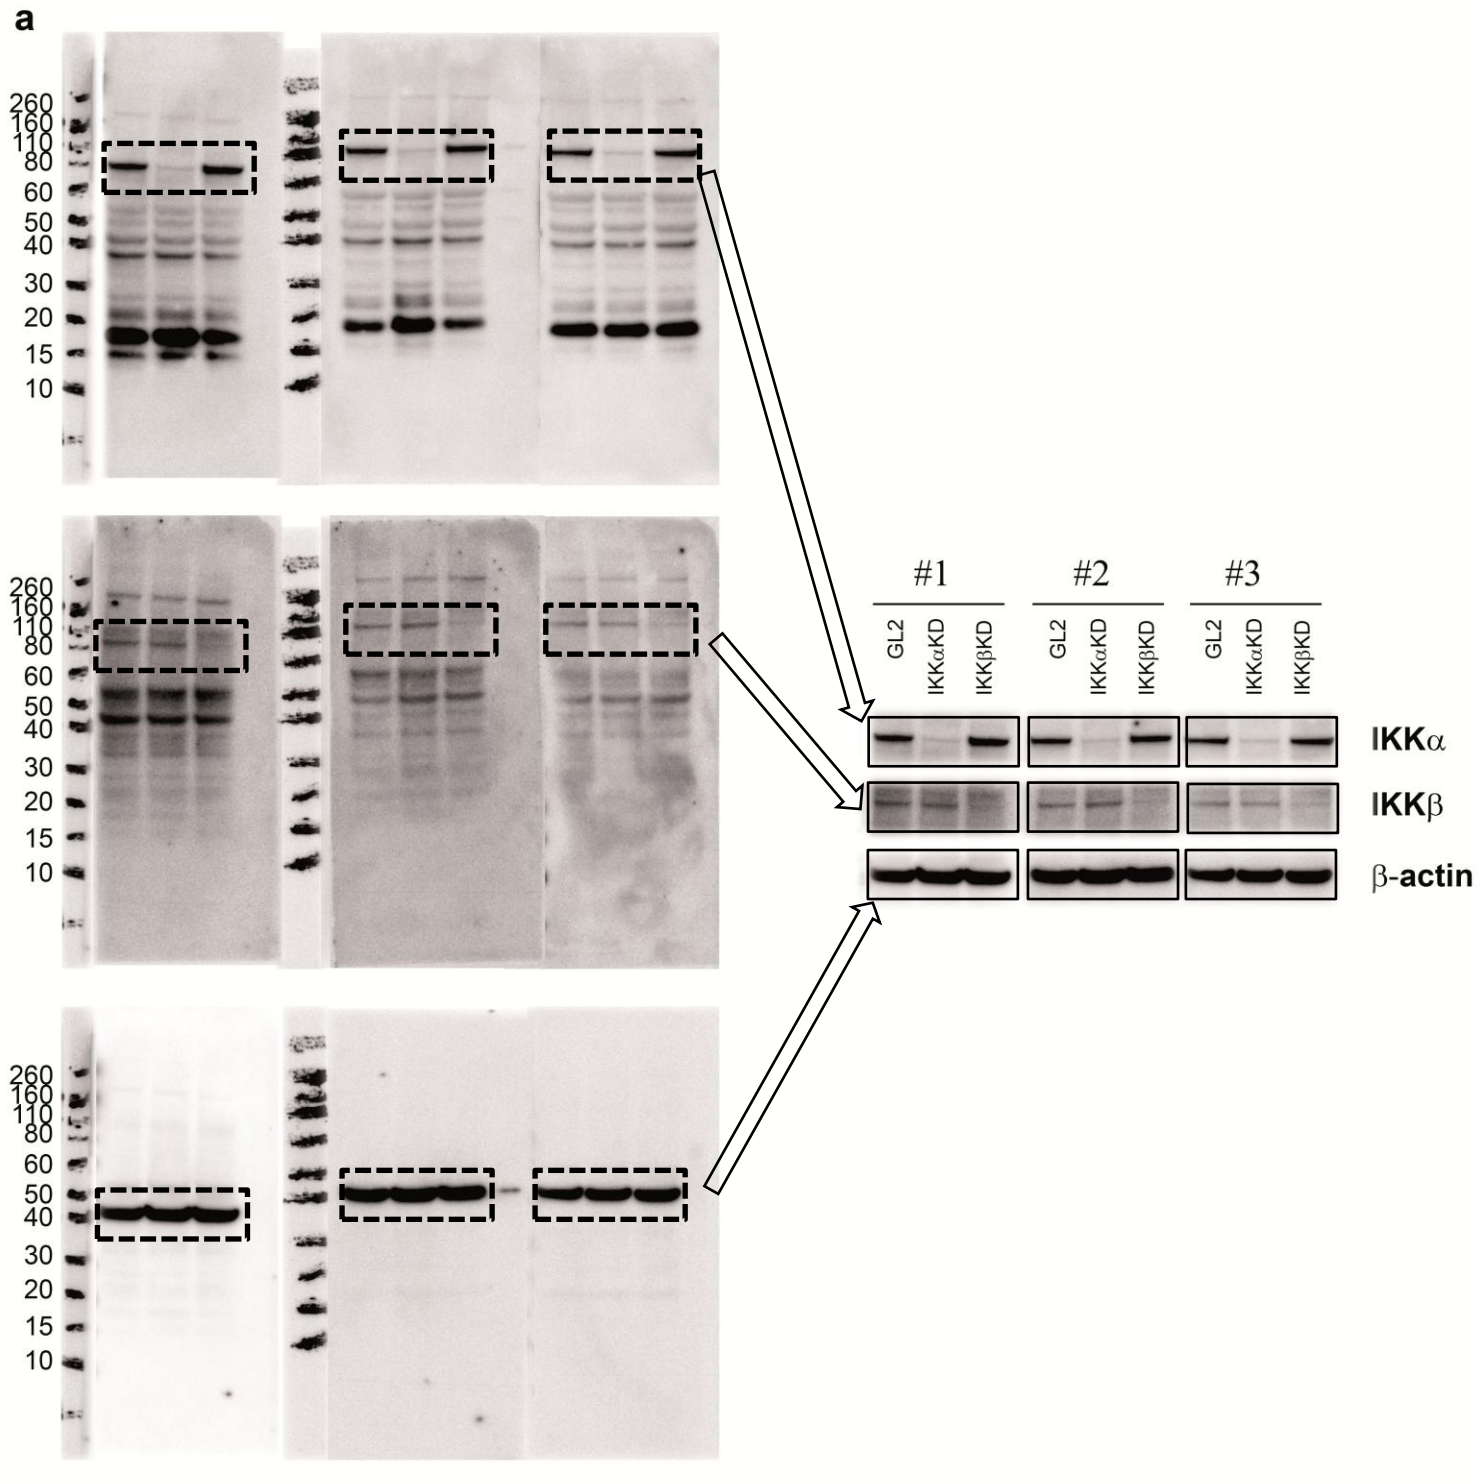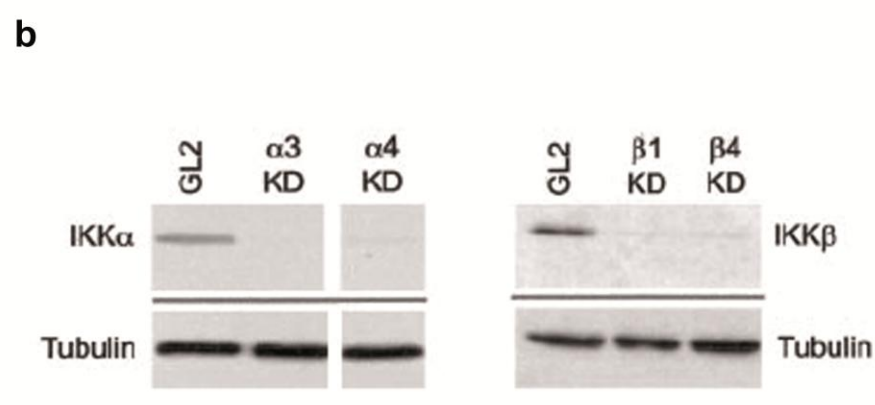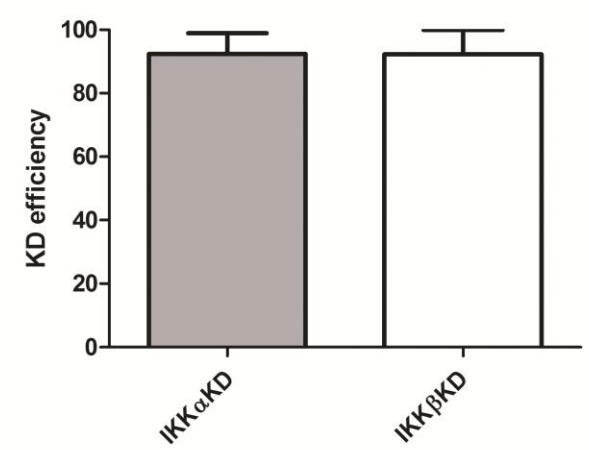

| Array Layout                      |                                 |                                          |                              |                            |                              |                                |                                 |
|-----------------------------------|---------------------------------|------------------------------------------|------------------------------|----------------------------|------------------------------|--------------------------------|---------------------------------|
| RPS27A<br><b>1</b>                | AGTRL1<br><b>2</b>              | BDNF<br><b>3</b>                         | BLR1<br><b>4</b>             | C20orf175<br><b>5</b>      | C5<br><b>6</b>               | CCBP2<br><b>7</b>              | CCL11/I-309<br><b>8</b>         |
| CCL11/Eotaxin<br><b>9</b>         | CCL13/MCP-4<br><b>10</b>        | CCL15/HCC-2<br><b>11</b>                 | CCL16/HCC-4<br><b>12</b>     | CCL17/TARC<br><b>13</b>    | CCL18/PARC<br><b>14</b>      | CCL19/ELC<br><b>15</b>         | CCL2/MCP-1<br><b>16</b>         |
| CCL20/MIP-3 $\alpha$<br><b>17</b> | CCL21/SLC<br><b>18</b>          | CCL23/MPIF-1<br><b>19</b>                | CCL24/Eotaxin-2<br><b>20</b> | CCL25/TECK<br><b>21</b>    | CCL26/Eotaxin-3<br><b>22</b> | CCL27/CTACK<br><b>23</b>       | CCL28<br><b>24</b>              |
| CCL3/MIP-1 $\alpha$<br><b>25</b>  | CCL4/MIP-1 $\beta$<br><b>26</b> | CCL4L1<br><b>27</b>                      | CCL5/RANTES<br><b>28</b>     | CCL7/MCP-3<br><b>29</b>    | CCL8/MCP-2<br><b>30</b>      | CCR1<br><b>31</b>              | CCR2<br><b>32</b>               |
| CCR3<br><b>33</b>                 | CCR4<br><b>34</b>               | CCR5<br><b>35</b>                        | CCR6<br><b>36</b>            | CCR7<br><b>37</b>          | CCR8<br><b>38</b>            | CCR9<br><b>39</b>              | CCRL1<br><b>40</b>              |
| CCRL2<br><b>41</b>                | CKLF<br><b>42</b>               | CMTM1<br><b>43</b>                       | CMTM2<br><b>44</b>           | CMTM3<br><b>45</b>         | CMTM4<br><b>46</b>           | CMTM5<br><b>47</b>             | CMTM6<br><b>48</b>              |
| CMTM7<br><b>49</b>                | CMTM8<br><b>50</b>              | CMKLR1<br><b>51</b>                      | CMKOR1<br><b>52</b>          | CSF3<br><b>53</b>          | CX3CL1<br><b>54</b>          | CX3CR1<br><b>55</b>            | CXCL1/GRO $\alpha$<br><b>56</b> |
| CXCL10/IP-10<br><b>57</b>         | CXCL11/I-TAC<br><b>58</b>       | CXCL12/SDF-1 $\alpha/\beta$<br><b>59</b> | CXCL13/BCA-1<br><b>60</b>    | CXCL14/BRAK<br><b>61</b>   | CXCL16/?<br><b>62</b>        | CXCL2/GRO $\beta$<br><b>63</b> | CXCL3/GRO $\gamma$<br><b>64</b> |
| CXCL5/ENA-78<br><b>65</b>         | CXCL6/GCP-2<br><b>66</b>        | CXCL9/Mig<br><b>67</b>                   | CXCR3<br><b>68</b>           | CXCR4<br><b>69</b>         | CXCR6<br><b>70</b>           | CYFIP2<br><b>71</b>            | ECGF1<br><b>72</b>              |
| EPO<br><b>73</b>                  | FY<br><b>74</b>                 | GDF5<br><b>75</b>                        | GPR109B<br><b>76</b>         | CCR10<br><b>77</b>         | GPR31<br><b>78</b>           | C5R1<br><b>79</b>              | GPR81<br><b>80</b>              |
| HIF1A<br><b>81</b>                | IL13<br><b>82</b>               | IL16<br><b>83</b>                        | IL18<br><b>84</b>            | IL1A<br><b>85</b>          | IL4<br><b>86</b>             | IL8<br><b>87</b>               | IL8RA<br><b>88</b>              |
| IL8RB<br><b>89</b>                | LTB4R<br><b>90</b>              | MMP2<br><b>91</b>                        | MMP7<br><b>92</b>            | MYD88<br><b>93</b>         | NFKB1<br><b>94</b>           | PF4<br><b>95</b>               | PPBP<br><b>96</b>               |
| PRL<br><b>97</b>                  | RGS13<br><b>98</b>              | RGS3<br><b>99</b>                        | SCYE1<br><b>100</b>          | SDF2<br><b>101</b>         | SLIT2<br><b>102</b>          | TCP10<br><b>103</b>            | TLR2<br><b>104</b>              |
| TLR4<br><b>105</b>                | TNF<br><b>106</b>               | TNFRSF1A<br><b>107</b>                   | TNFSF14<br><b>108</b>        | TREM1<br><b>109</b>        | TREM2<br><b>110</b>          | VHL<br><b>111</b>              | XCL1<br><b>112</b>              |
| XCR1<br><b>113</b>                | <b>Blank</b><br><b>114</b>      | PUC18<br><b>115</b>                      | <b>Blank</b><br><b>116</b>   | <b>Blank</b><br><b>117</b> | AS1R2<br><b>118</b>          | AS1R1<br><b>119</b>            | AS1<br><b>120</b>               |
| GAPDH<br><b>121</b>               | B2M<br><b>122</b>               | HSPCB<br><b>123</b>                      | HSPCB<br><b>124</b>          | ACTB<br><b>125</b>         | ACTB<br><b>126</b>           | BAS2C<br><b>127</b>            | BAS2C<br><b>128</b>             |

S3

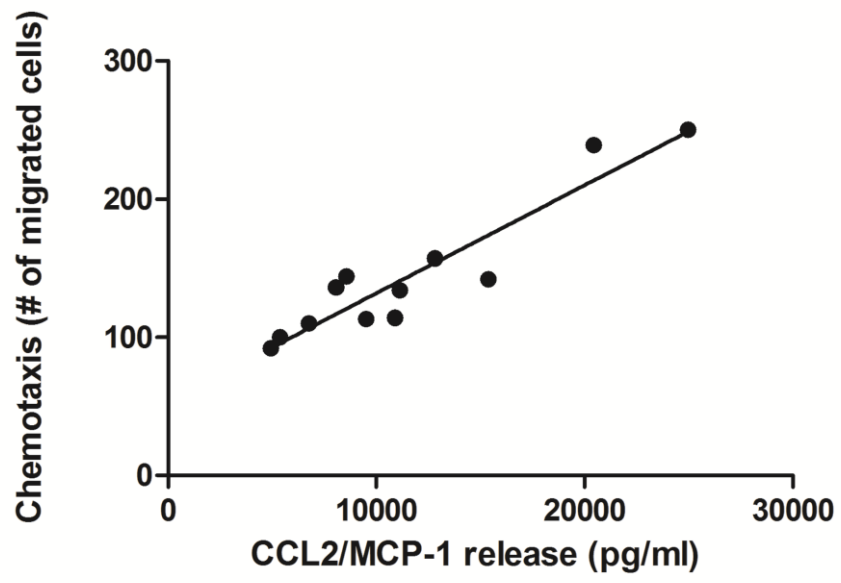

# S4

**a**

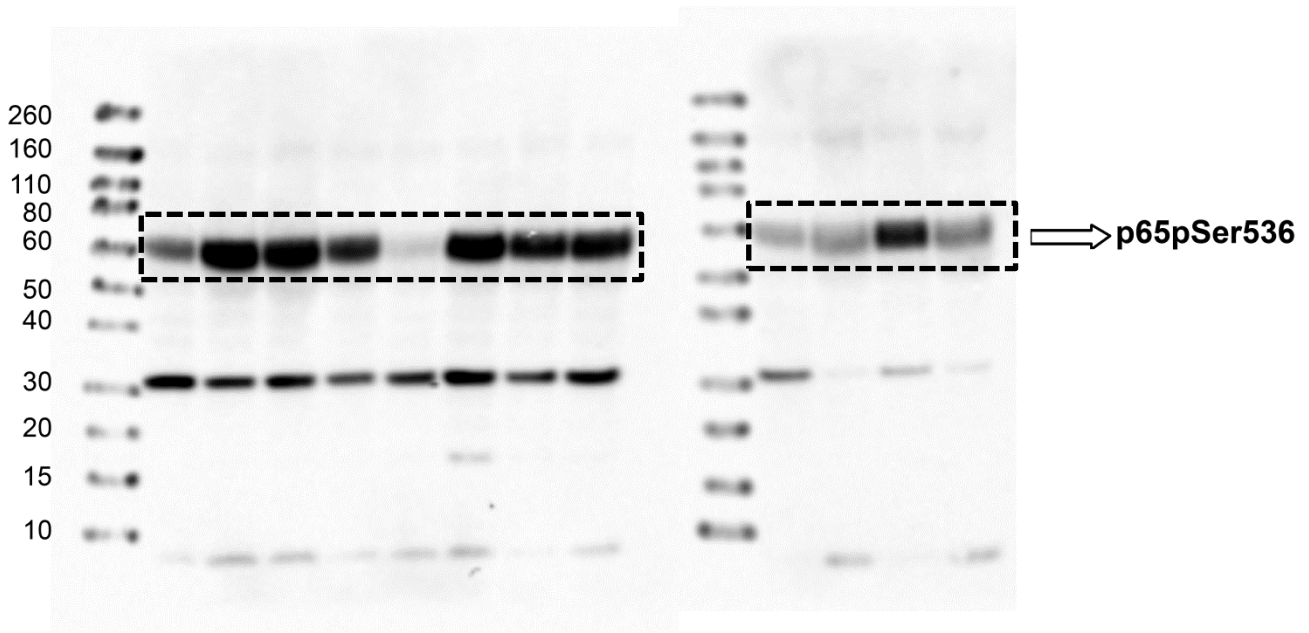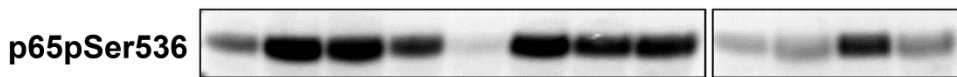

**b**

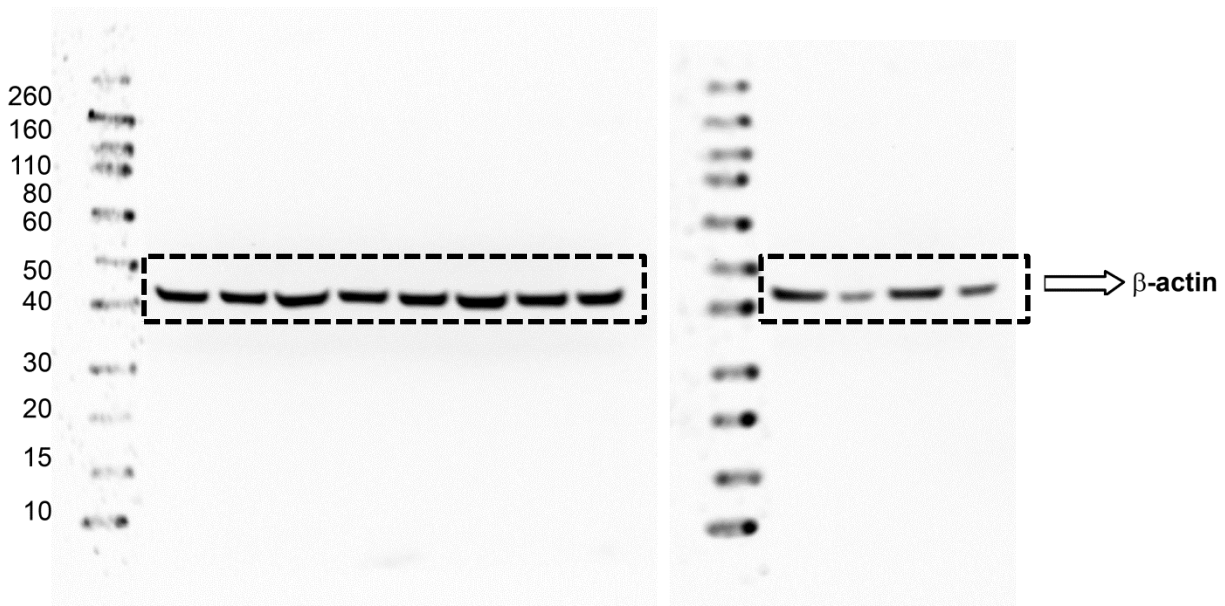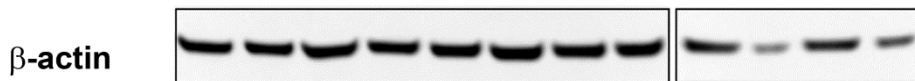

a

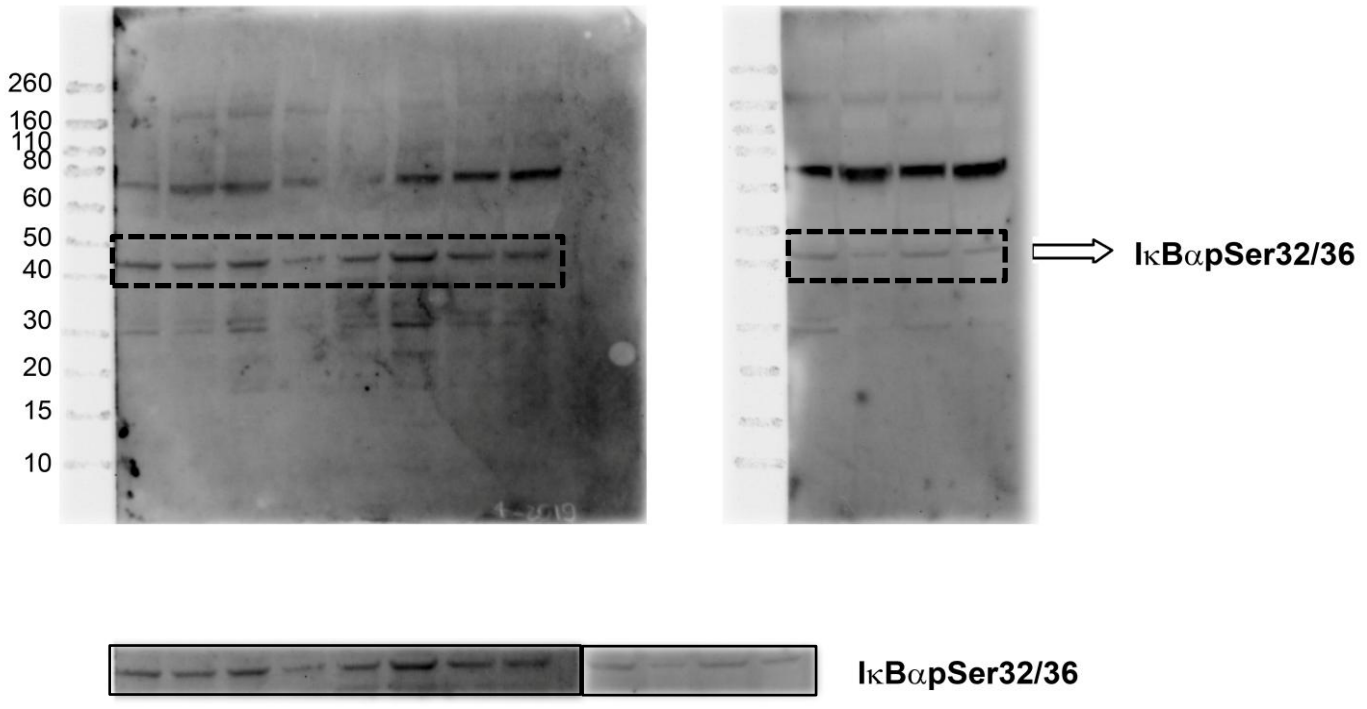

b

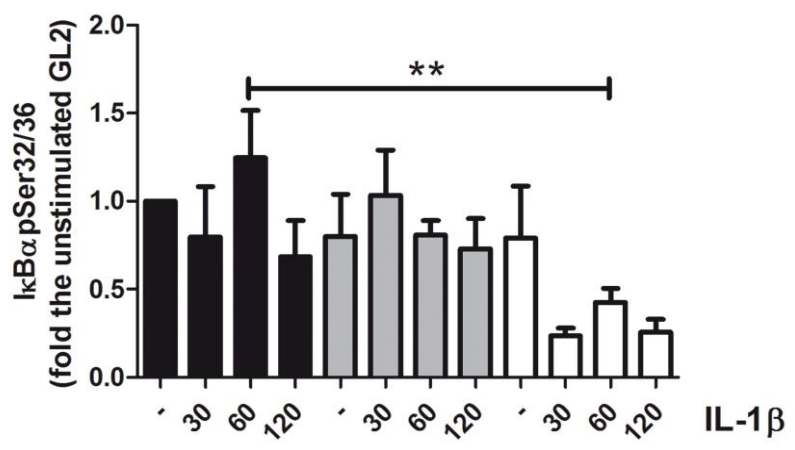



### Differential expression of IKK $\alpha$ in OA vs. Non-OA cartilage

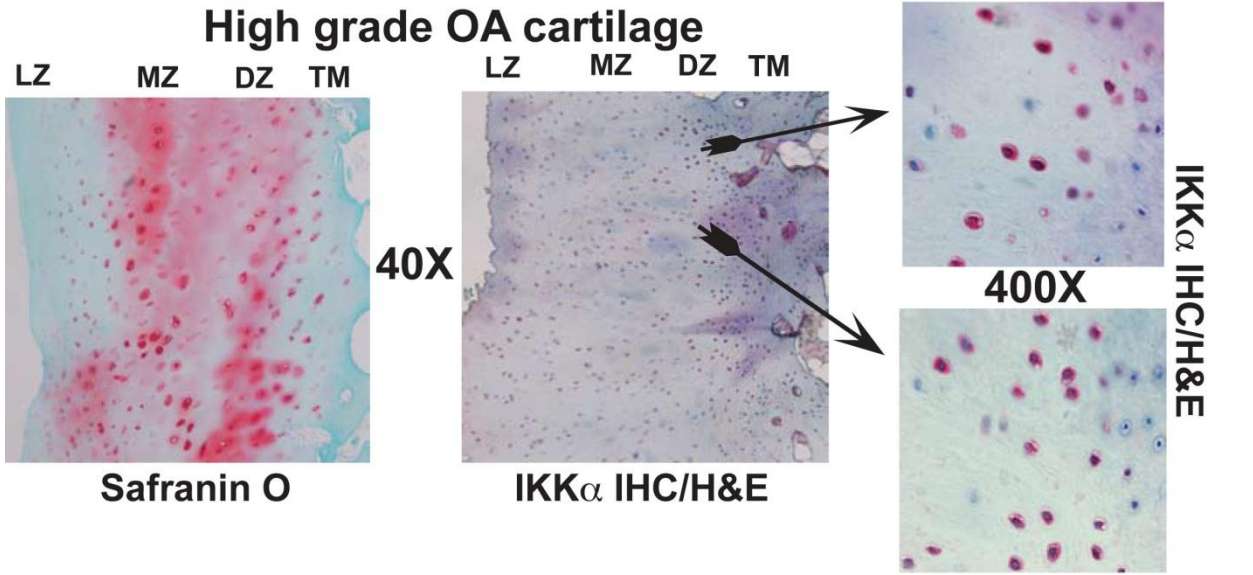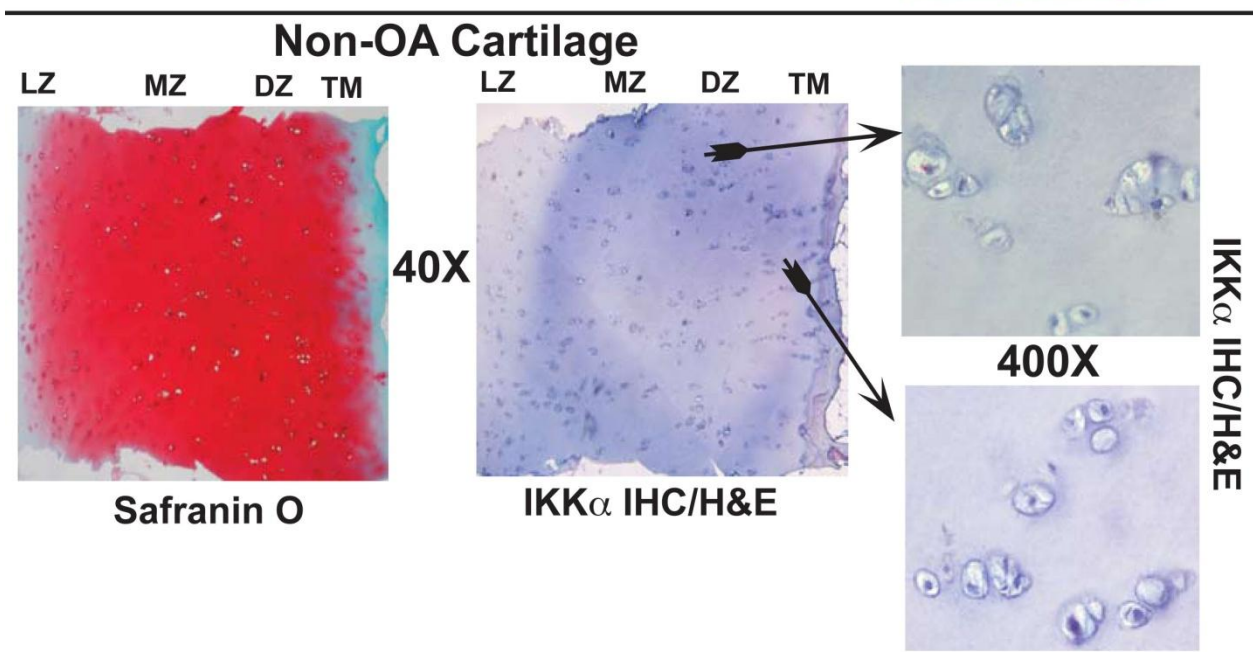

S7

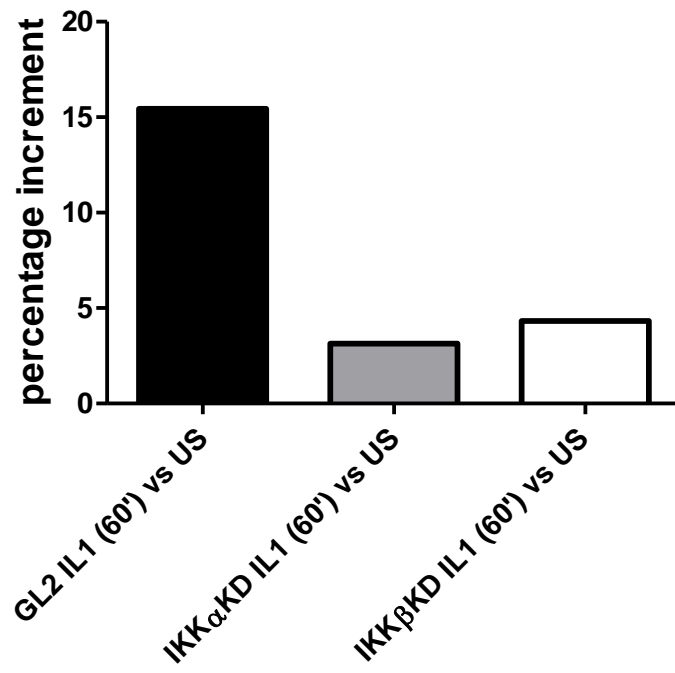



## Legend to Supplementary Figures

**Figure S1:** **a)** Representative examples obtained with three different primary cultures treated with retroviral transduction of shRNA to obtain GL2 control chondrocytes, IKK $\alpha$ KD and IKK $\beta$ KD chondrocytes. Full blots (left) obtained with the same membranes probed with anti-IKK $\alpha$ , anti-IKK $\beta$  and anti- $\beta$ -actin antibodies. At the end of puromycin selection, the cells were recovered by trypsinization and counted. Total proteins derived from equal cell equivalents were loaded in NuPAGE Novex 4-12% Bis-Tris gels. Samples were run with MES buffer, along with Novex Sharp Pre-Stained Protein Standards. After protein transfer, the lanes containing the standards were cut from the membranes containing the samples. To assess the molecular weight of western blot stained bands the pre-stained bands of the markers were highlighted by mean of a Glow Writer pen (<http://divbio.com/glow-writerpen.aspx>) and at the end of western blotting, the lanes containing the Protein Standards were juxtaposed to the original membranes. The dashed rectangles indicates the bands included in the crops, and on the right the arrows indicates the protein bands used to set up the right cumulative figure. **b)** left: example taken from our first publication (Olivotto, E. *et al. Arthritis Rheum* **58**, 227-239, doi:10.1002/art.23211 (2008)) of the efficiency of different vectors to obtain knockdown of either IKK $\alpha$  or IKK $\beta$ . Cumulative evaluation of KD efficiency (mean  $\pm$  SD) for either IKK $\alpha$  and IKK $\beta$ KD cultures. Data derived from 10 different infections.

**Figure S2:** Layout of the probes of the Oligo GEArray microarray human chemokines and receptors microarray (OHS-022, SuperArray), used for Figure 1a and 1b of the main manuscript.

**Figure S3:** The extent of chemotaxis in term of number of migrated cells is highly correlated to the CCL2/MCP-1 concentration (pg/ml), as evaluated by mean of the Pearson r ( $r=0.94$ ,  $p<0.0001$ , two-tailed,  $n=12$ ). The figure reports the correlation between chemotaxis and CCL2/MCP-1 concentration obtained from unstimulated and IL-1 $\beta$  stimulated samples (GL2, IKK $\alpha$ KD and IKK $\beta$  KD) derived from primary chondrocyte cultures established from two different patients. The figure represents the subset of the data obtained with high density monolayer cultures.

**Figure S4:** Full blots used to derive the p65pSer536 (**a**) and  $\beta$ -actin (**b**) results shown in Figure 4A of the main manuscript obtained with lysates of high density cultures of chondrocytes with either the control shRNA (GL2) or with IKK $\alpha$ KD or IKK $\beta$ KD. At the end of stimulation, the cells were recovered by trypsinization and counted. Total proteins derived from equal cell equivalents were loaded in NuPAGE Novex 4-12% Bis-Tris gels. Samples were run with MES buffer, along with

Novex Sharp Pre-Stained Protein Standards. After protein transfer, the lanes containing the standards were cut from the membranes containing the samples. To assess the molecular weight of western blot stained bands the pre-stained bands of the markers were highlighted by mean of a Glow Writer pen (<http://divbio.com/glow-writerpen.aspx>) and at the end of western blotting, the lanes containing the Protein Standards were juxtaposed to the original membranes. The dashed rectangles indicates the bands included in the crops, and on the right the arrow indicates the protein bands used to set up Figure 4a, whose cumulative image is reported below each set of full blots.

**Figure S5:** **a)** The same blots used to assemble Figure 4 were used to assess the level of I $\kappa$ B $\alpha$  Ser32/36. The figure shows the results obtained with the same membrane shown in Figure S4, therefore the housekeeping loading control is the same shown in Figure S4. **b)** Data obtained from the three experiments underwent densitometric analysis, and the cumulative results reported as mean  $\pm$  SD fold increase the level of the control unstimulated GL2. The means of the groups were compared by the Student's t test. The differences were considered significant when  $p < 0.05$  with \* $p < 0.05$ ; \*\* $p < 0.01$ ; and \*\*\* $p < 0.001$ . Different patterns are used for different phenotypes: GL2 black, IKK $\alpha$ KD gray, IKK $\beta$ KD white. The 30 min I $\kappa$ B $\alpha$  Ser32/36 levels were higher in GL2 compared to the levels in the IKK $\beta$ KD level.

**Figure S6:** IKK $\alpha$  expression was analyzed by immunohistochemistry (IHC), with hematoxylin-eosin, (H&E) as a nuclear counterstaining in sections of full thickness explants of cartilage and subchondral bone derived from areas with conserved (Non-OA) versus areas with marked perturbation of cartilage extracellular matrix (OA), as assessed by Safranin-O staining. As indicated, magnification was 40x for full depth images, while details shown on the right were taken at 400x magnification. LZ= lining zone; MZ= middle zone; DZ=deep zone; TM=tidemark. Images were obtained from cartilage slides processed for IHC as detailed in Materials and Methods of the main manuscript. Primary antibody was the Pharmingen mouse monoclonal anti-IKK $\alpha$  used at 5 $\mu$ g/ml and compared with the isotype control (Dako IgG2b at the same concentration).

**Figure S7:** As shown in Figure 5 of the main manuscript, immunofluorescence and confocal microscopy analysis, were used to investigated the extent of the combined occurrence of nuclear localized p65 (green signal, activated NF- $\kappa$ B monomer) and H3pSer10 (red signal for histone modification occurring after inflammatory cytokine delivery, which indicates IKK $\alpha$  epigenetic activity required for transcription initiation). The analysis was carried out at 1 hour post IL-1 $\beta$  addition. The graph summarizes the mean IL-1 $\beta$  dependent percentage increment of the signal compared to the basal level for each condition.
